# Supplementary material for: A novel magnetic resonance imaging scoring system for active and chronic changes in children and adolescents with juvenile idiopathic arthritis of the hip
Source: Springer Nature journal article supplement (doi:10.1007/s00247-022-05502-8), 2022-09-23
Supplement: MOESM2 [file 247_2022_5502_MOESM2_ESM.pdf]

# **MRI Scoring Atlas**

## **Juvenile Idiopathic Arthritis of the Hips**

### **A Guide to Application of a Novel Scoring System**

**General Scoring Principles:**

1. Score predominant finding
2. If in doubt, be conservative

## ENHANCEMENT INTENSITY

0 = NONE/ SUBTLE, 1 = MILD, 2 = MODERATE (SI < VESSELS), 3 = SEVERE (SI > VESSELS)

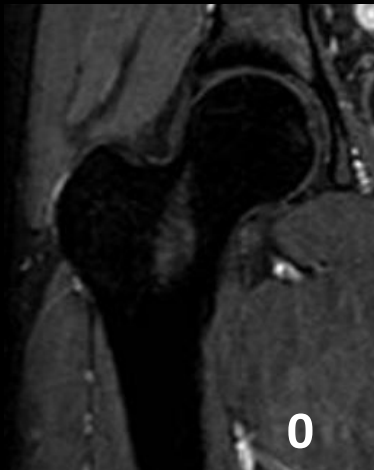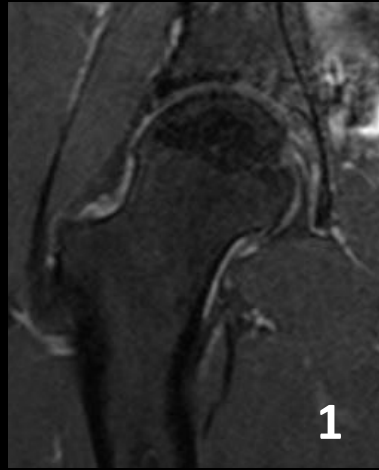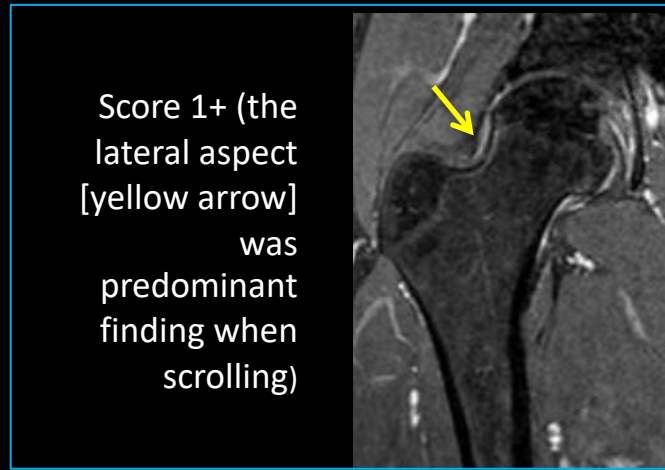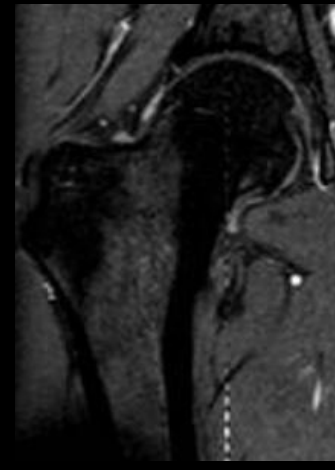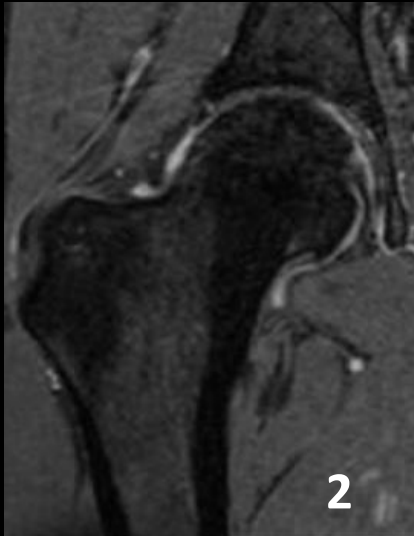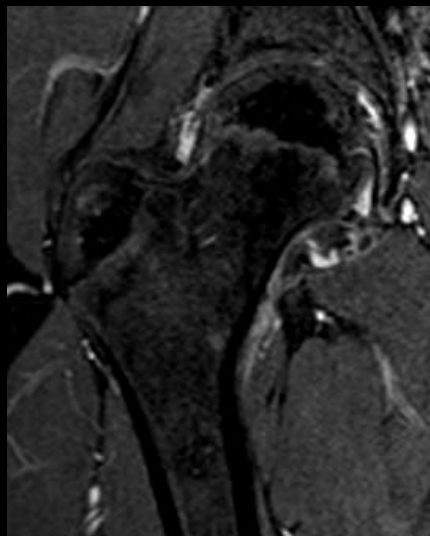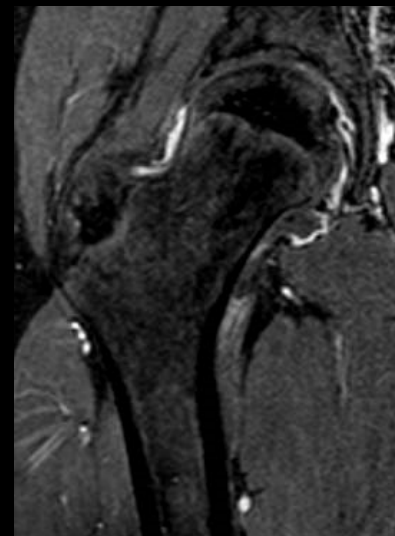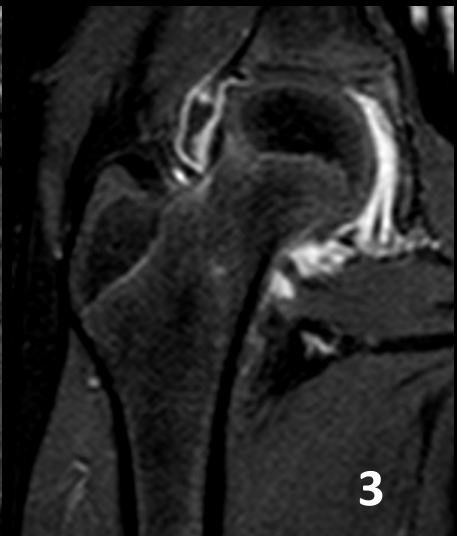

**SYNOVIAL THICKENING (SUBJECTIVE SCORING – T1FS + Gd)**

**0 = NOTHING, 1 = MILD, 2 = MODERATE, 3 = SEVERE**

**0**

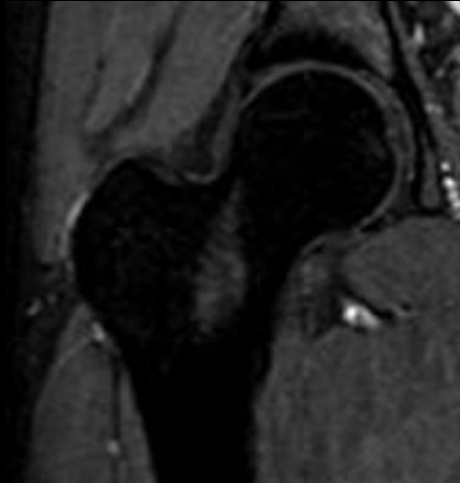

**1**

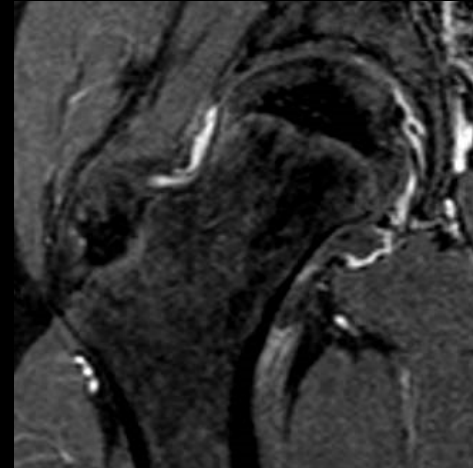

**2**

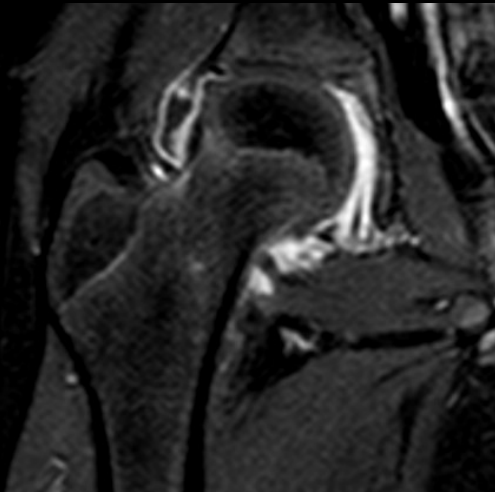

**3**

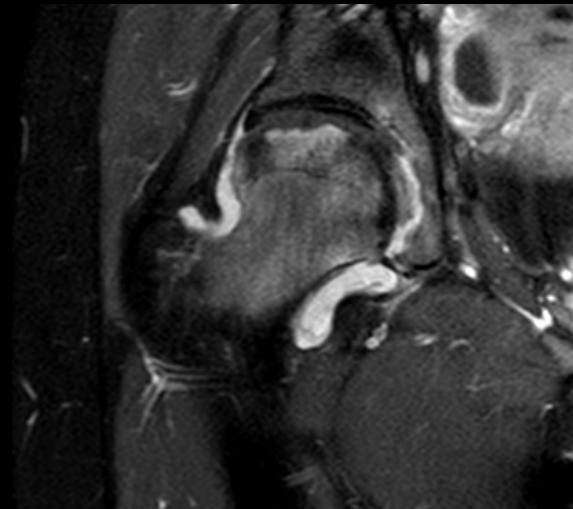

# SYNOVIAL THICKENING

(MEDIAL AND LATERAL – T1FS + Gd)

FIND A MID SECTION, APPROX WHERE YOU SEE FOVEA

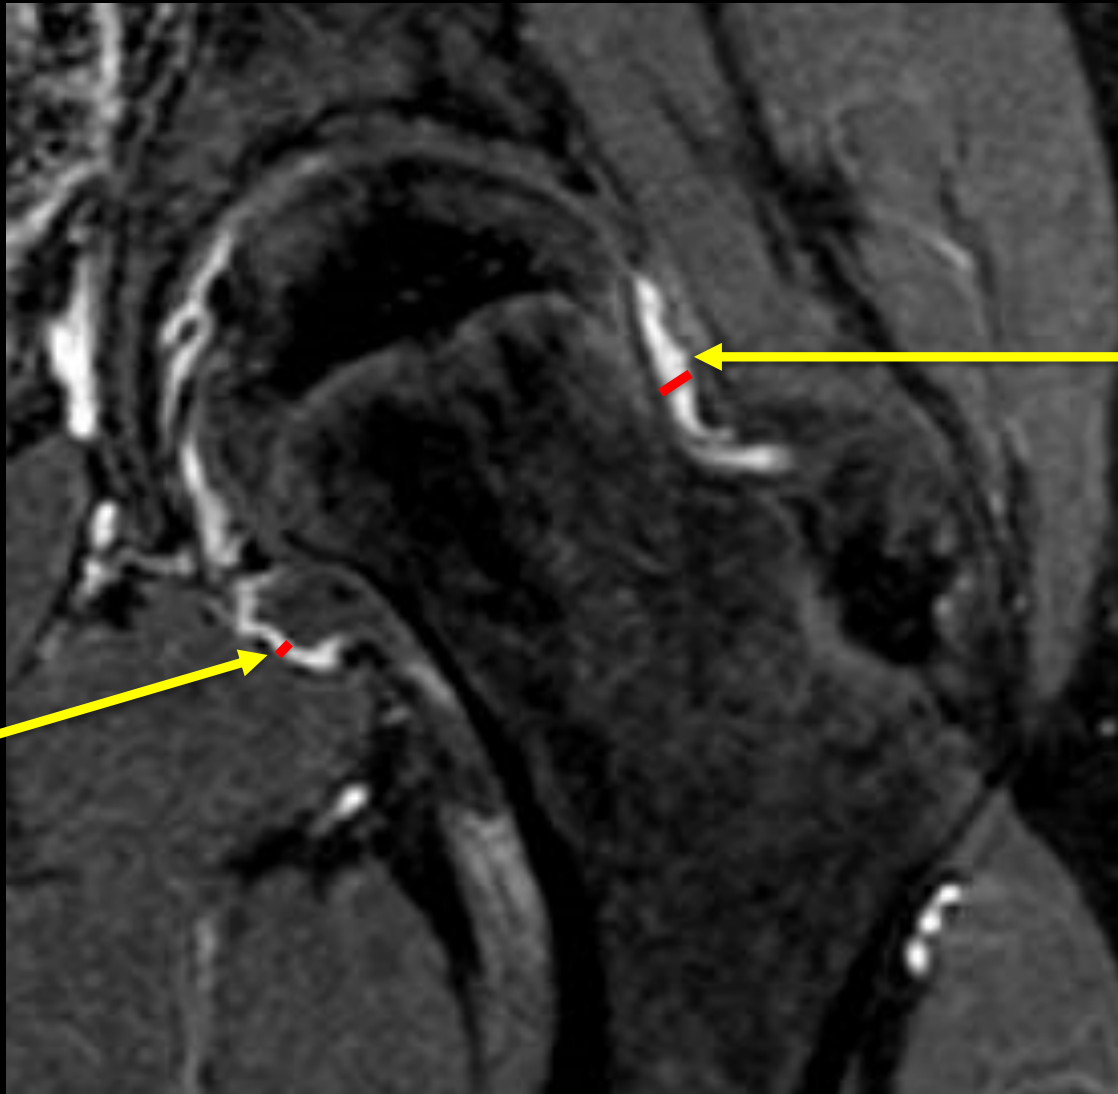

Medial – as you can see one layer this measure is ok

Lateral– here you must divide measurement by 2 (i.e. half the measurement)

# SYNOVIAL THICKENING

(AXIAL – T1FS + Gd)

FIND A MID SECTION, NOT TOO SUPERIOR OR INFERIOR

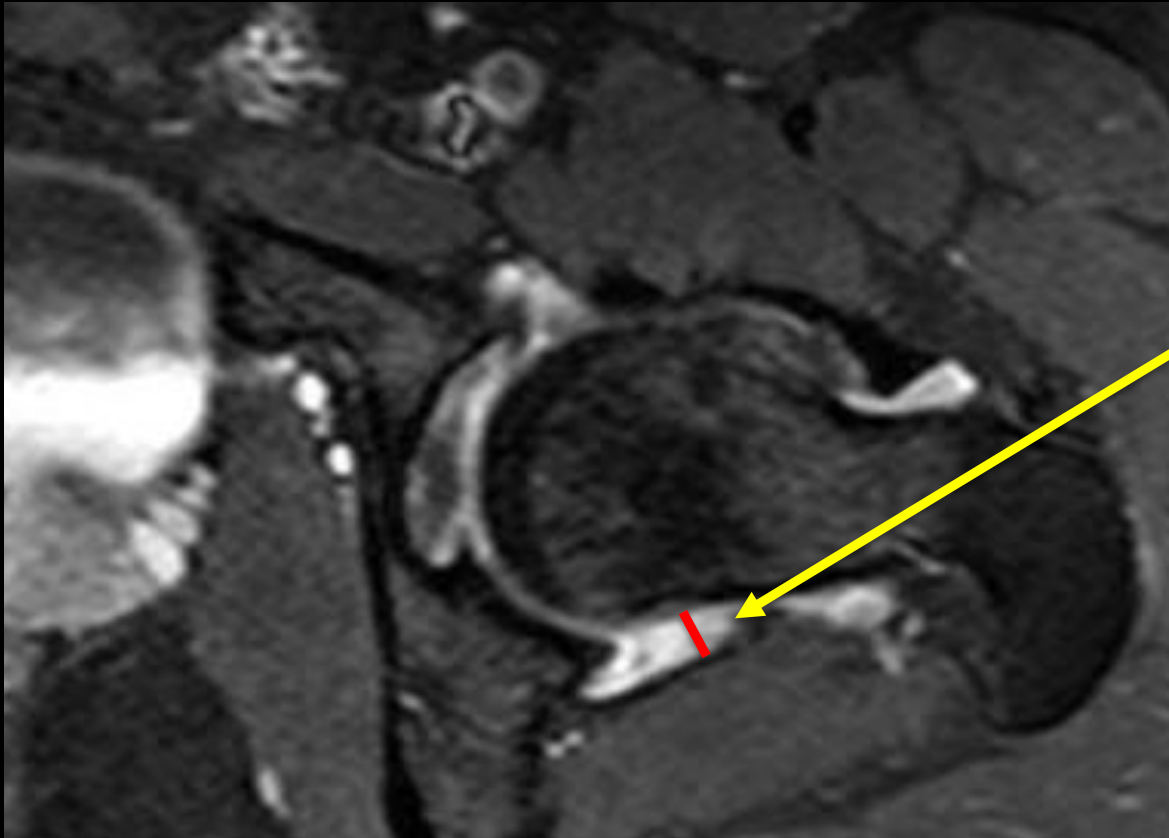

MEASURE  
ANTERIOR OR  
POSTERIOR –  
UP TO YOU.

Remember to  
divide by 2 if  
you are  
measuring 2  
layers, as in  
this example

**OVERALL SYNOVIAL INFLAMMATION (ENHANCEMENT + THICKENING – T1+C)**  
0 = NONE/ SUBTLE, 1 = MILD, 2 = MODERATE, 3 = SEVERE

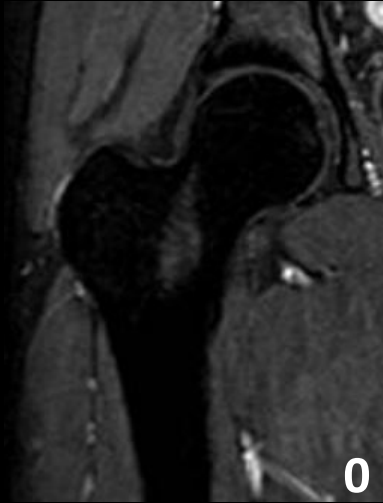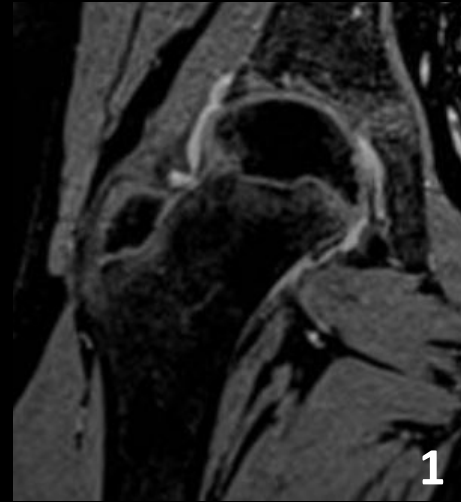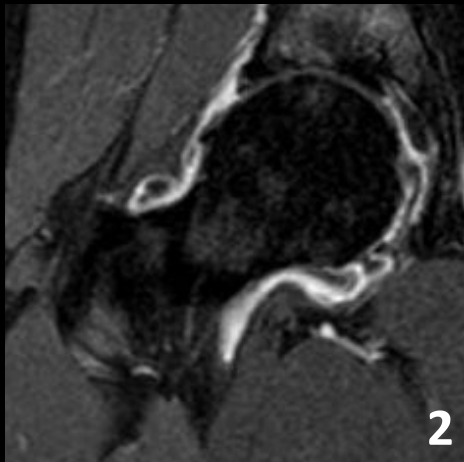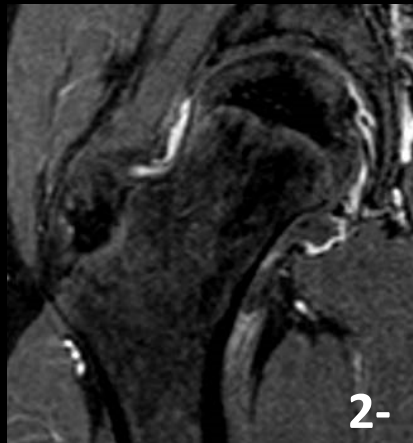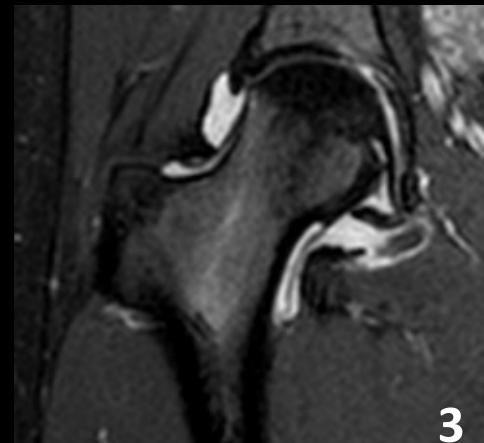

# EFFUSION (T2FS)

(0 = NONE), 1 = SLIVER, 2 = MILD, 3 = MODERATE, 4 = LARGE AMOUNT

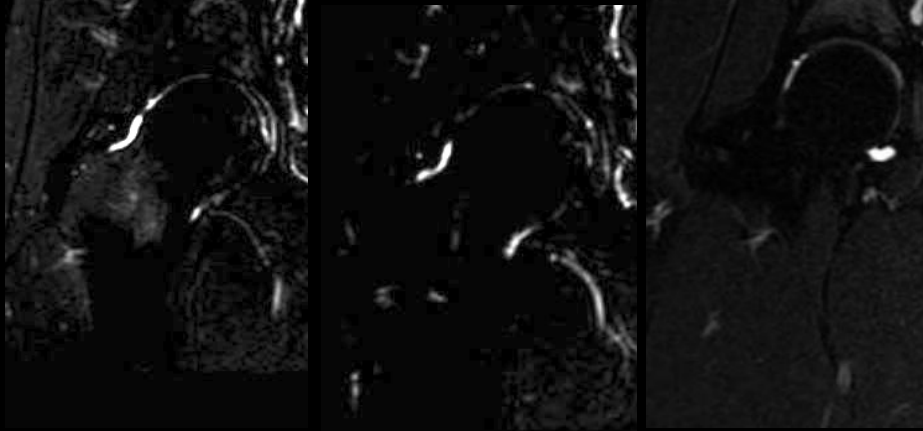

1

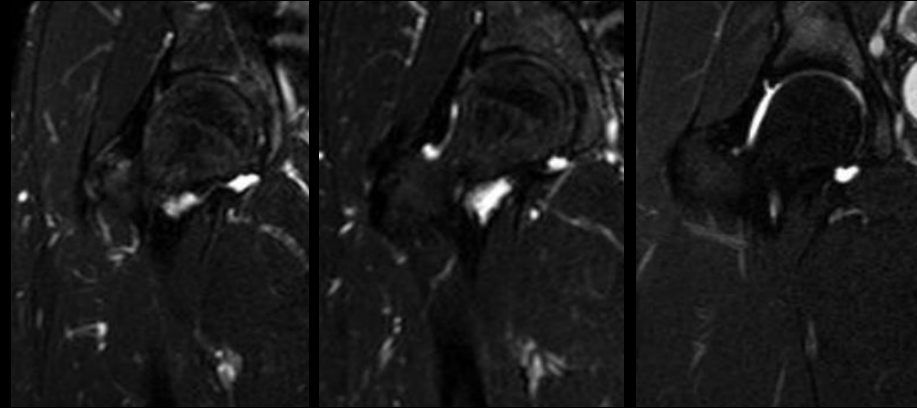

2

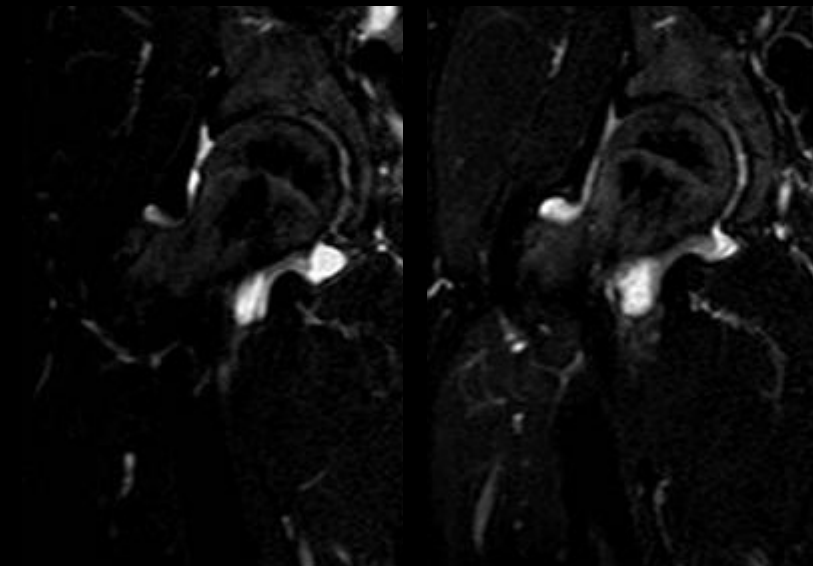

3

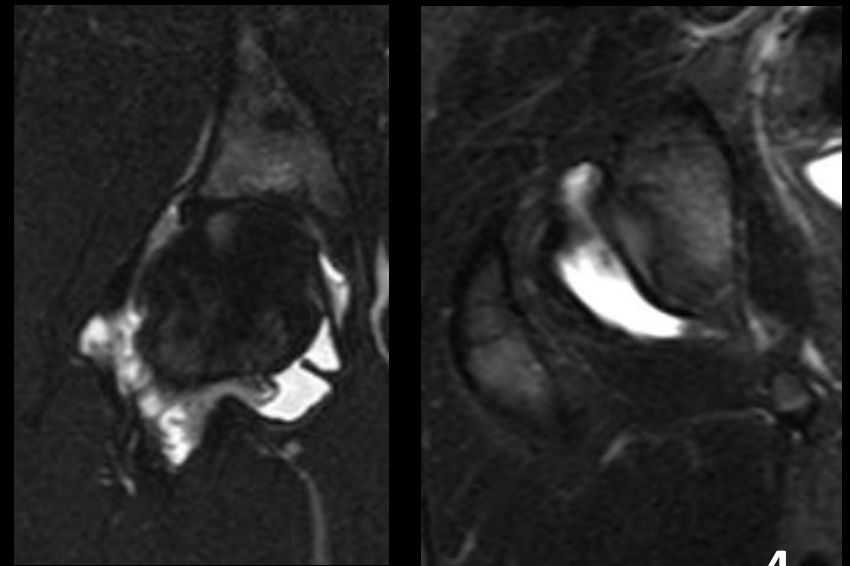

4

# OVERALL INFLAMMATION inc EFFUSION (T1FS + Gad / T2FS)

0 = NONE

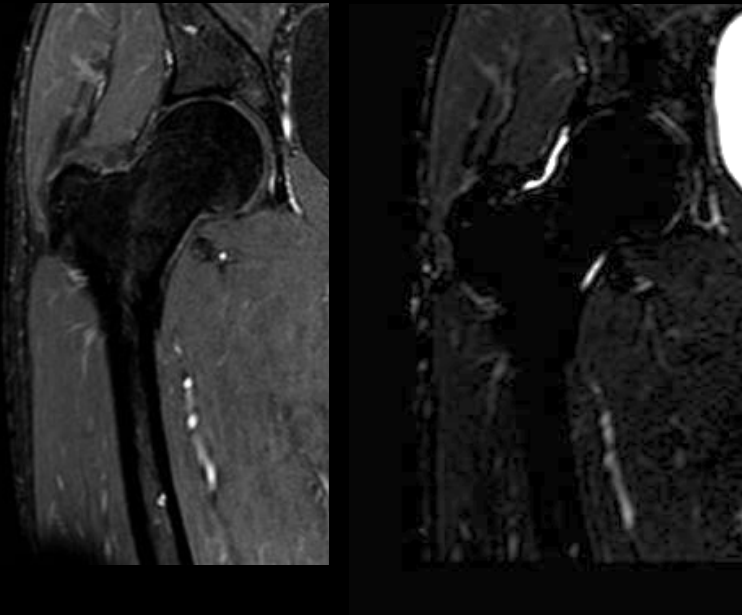

1 = MILD

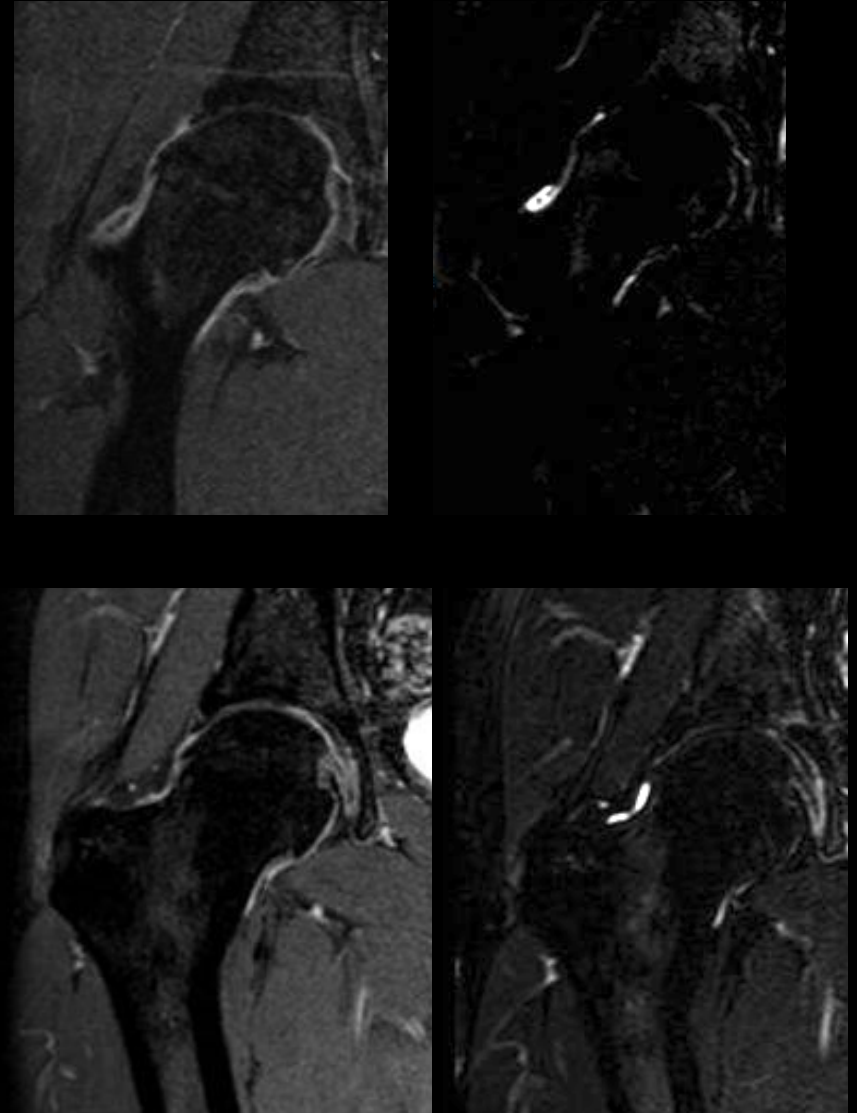



**OVERALL INFLAMMATION inc EFFUSION (T1FS + Gad / T2FS)**

**2 = MODERATE**

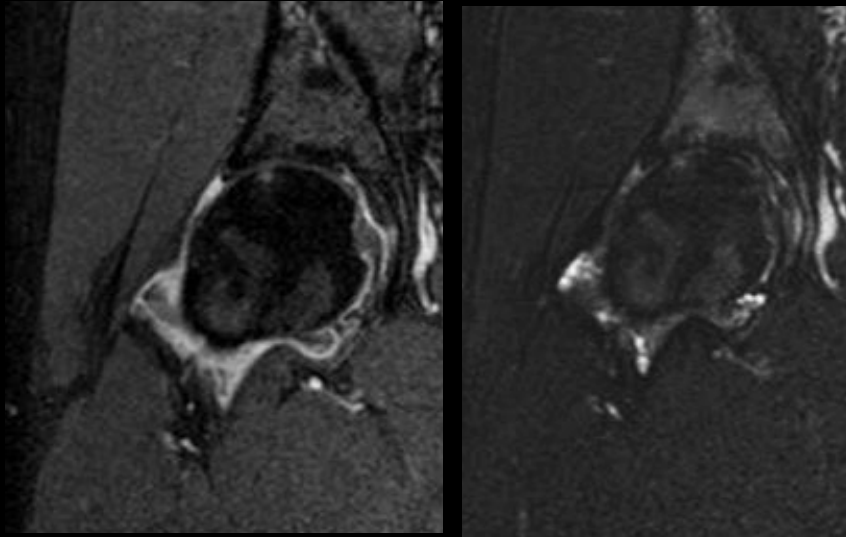

**3 = SEVERE**

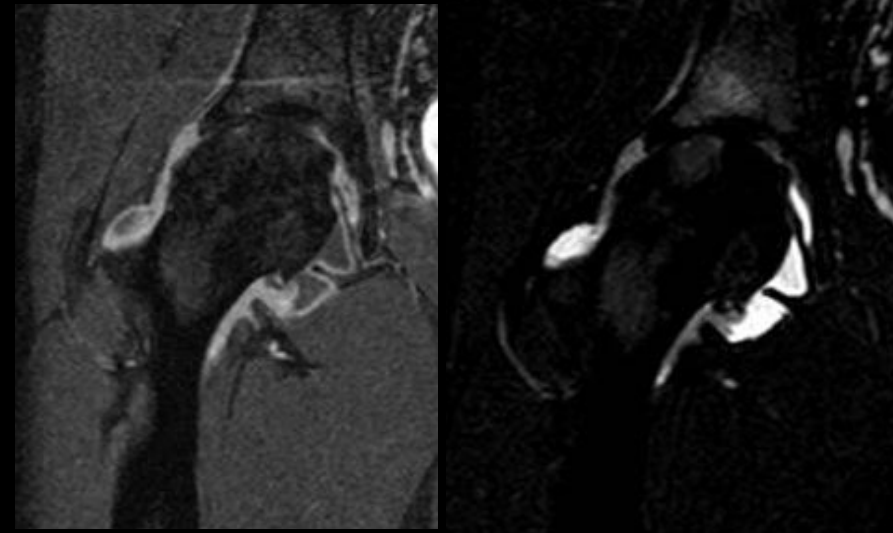

# BONE MARROW CHANGES FEMORAL HEAD

- 0=0%
- 1=1-33%
- 2= 34-66%,
- 3= 67%-100%

SCORE 1 – (T1 + T1C)

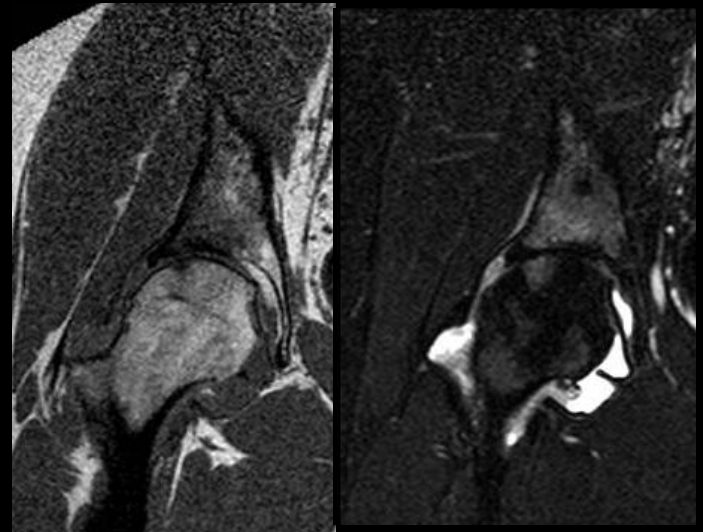

SCORE 2 – (T1 + T1C)

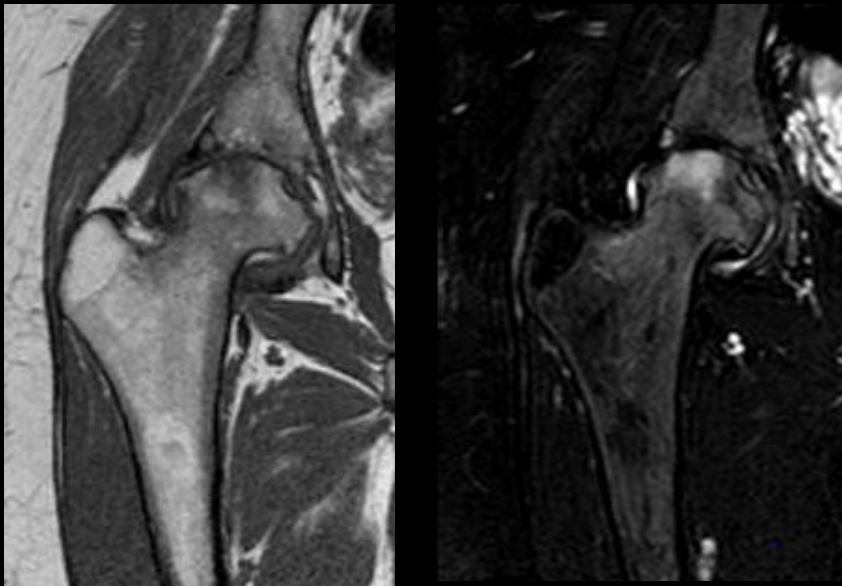

SCORE 3 – (T1 + T1C)

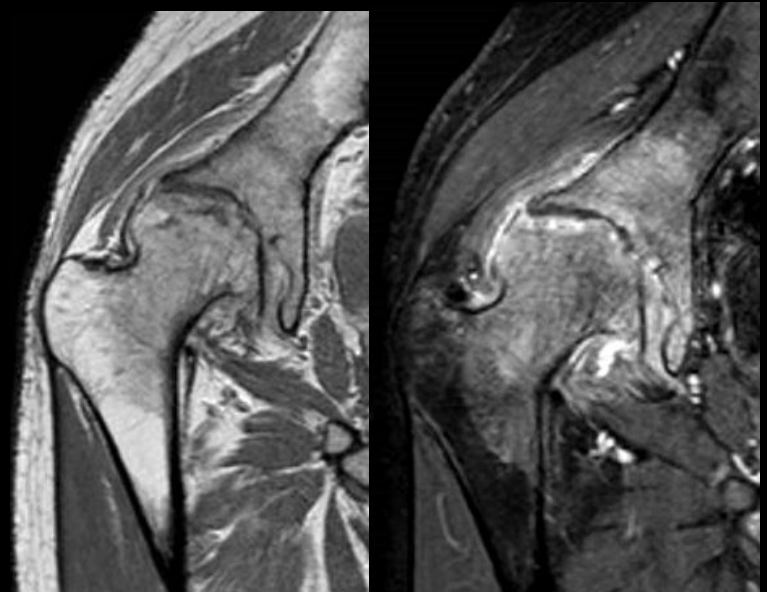

**SCORE 1 – (T1 + T2FS)**

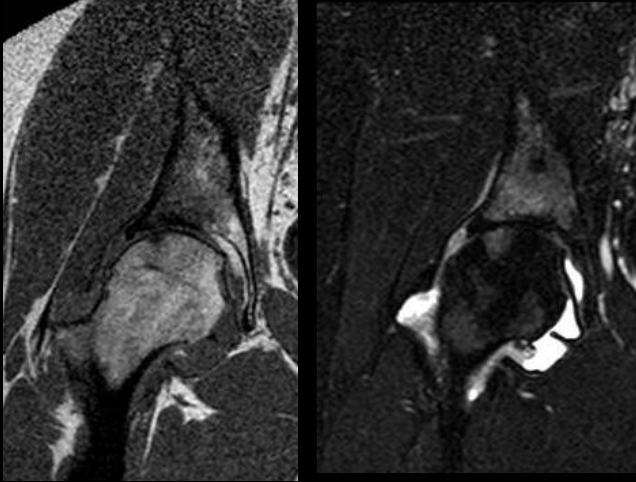

**SCORE 1 – (T1 + T2FS)**

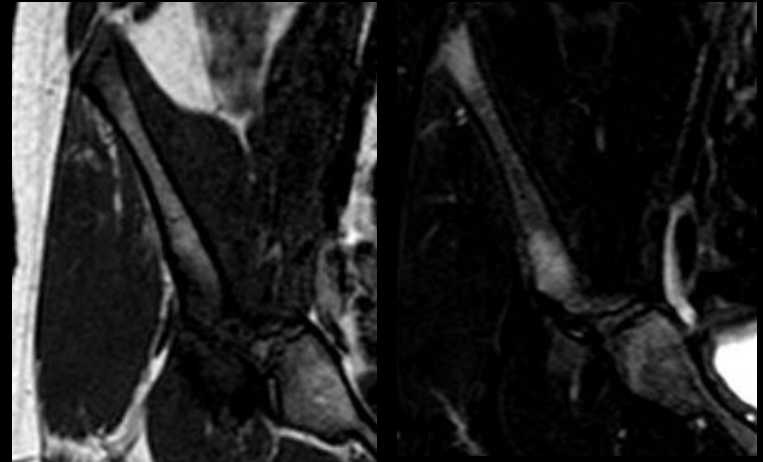

**BONE MARROW  
CHANGES  
ACETABULUM (Joint  
surface + 2cm rim)**

**0= NONE  
1= MILD  
2= MODERATE  
/SIGNIFICANT**

**SCORE 2 – (T1 + T2FS)**

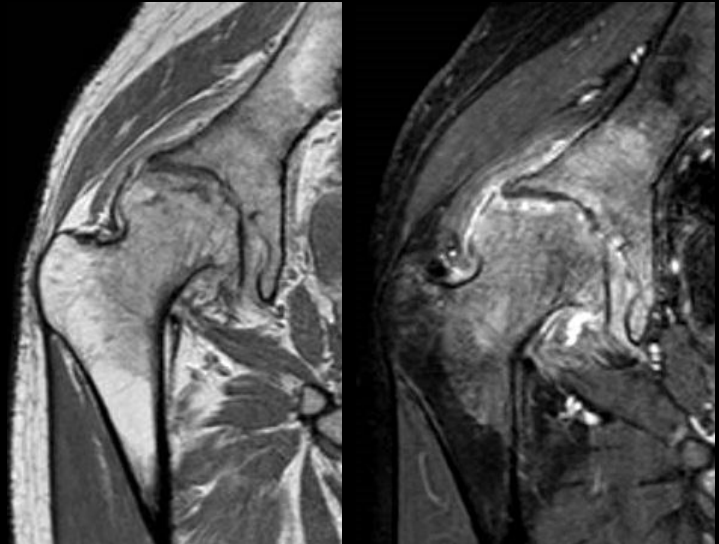

1= PRESENT

**BONE MARROW CHANGES  
FEMORAL NECK**

0= NONE  
1= PRESENT

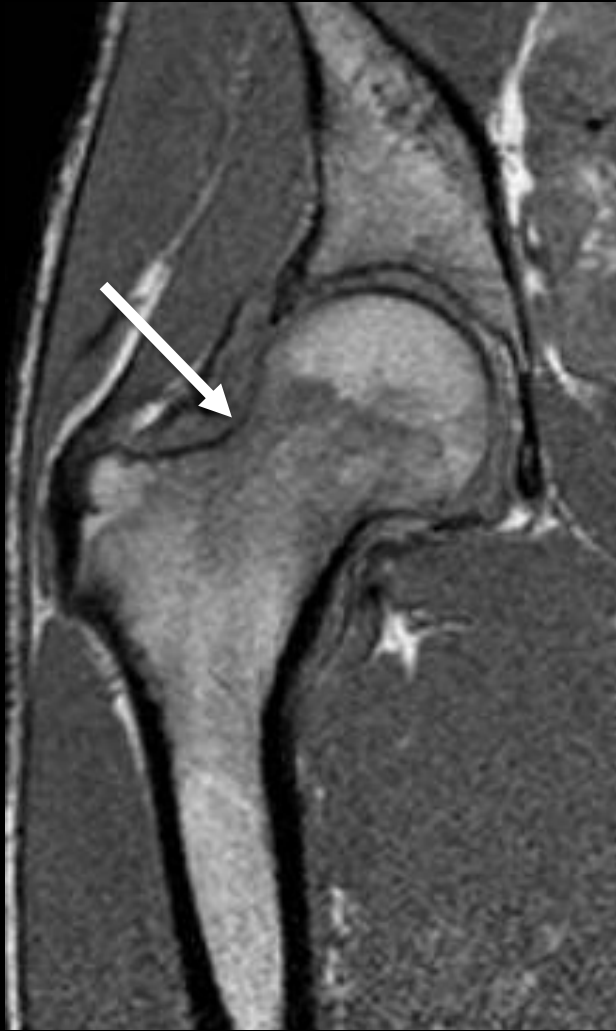

T1

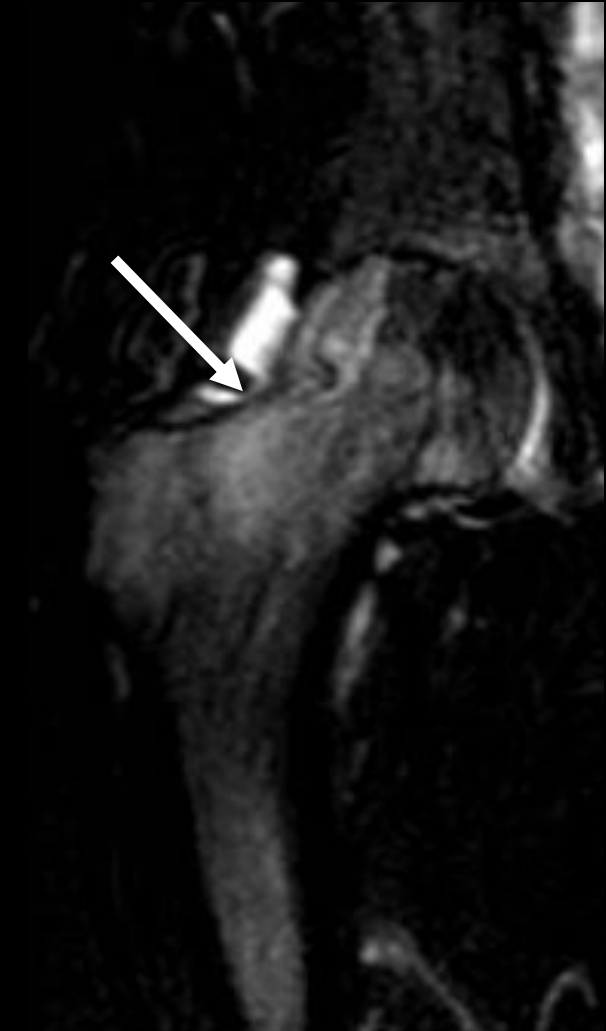

T2 + FS

## **EROSIONS OF FEMORAL HEAD :**

**0= 0%, 1= 1-25%, 2= 26-50%, 3 = 51 -75%, 4 = 76 - 100%**

**SCORE 1 (T1, T1c)**

**SCORE 2 (T1, T1c)**

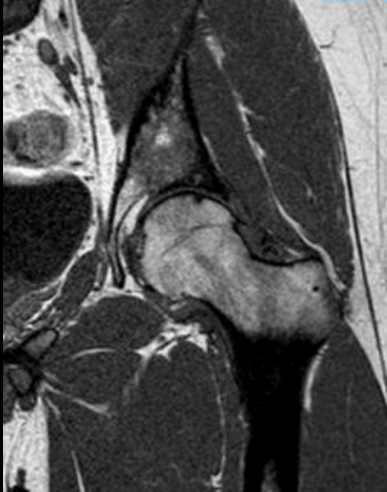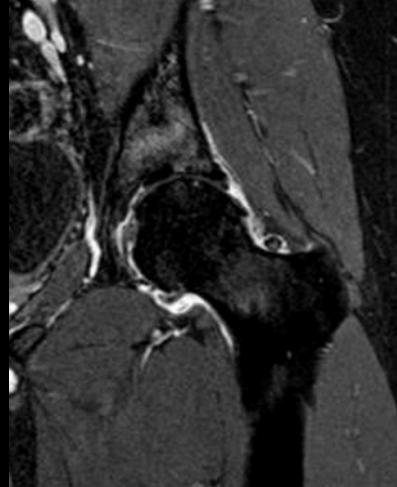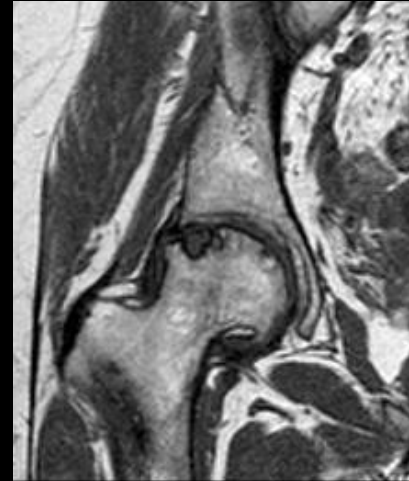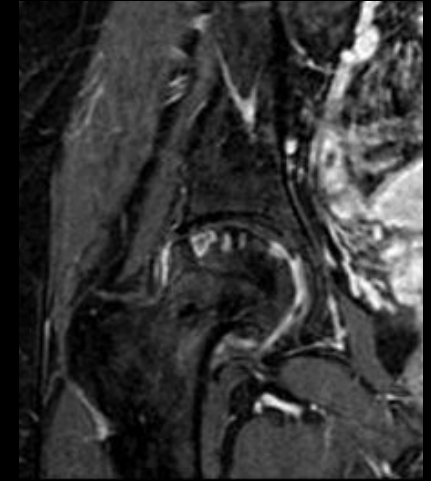

**SCORE 3 (T1, T1c)**

**SCORE 4 (T1, T1c)**

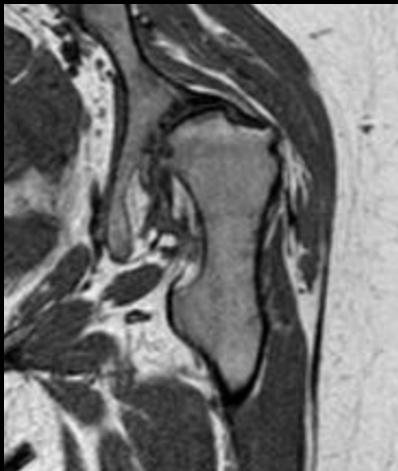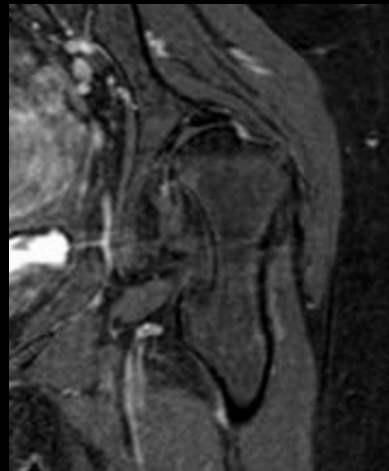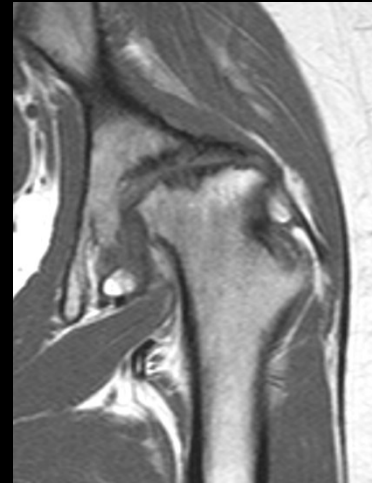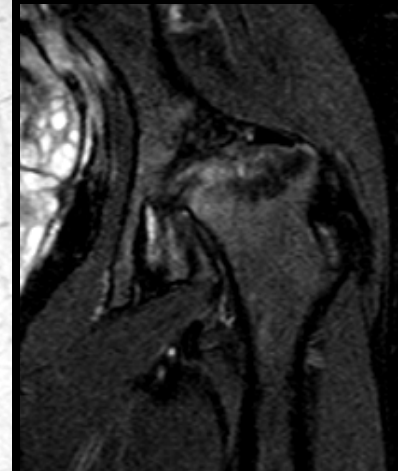

**EROSIONS OF ACETABULUM: 0= 0%, 1= 1- 33%, 2= 34- 66%, 3 = 67 -100%**

**SCORE 0 (T1, T1c)**

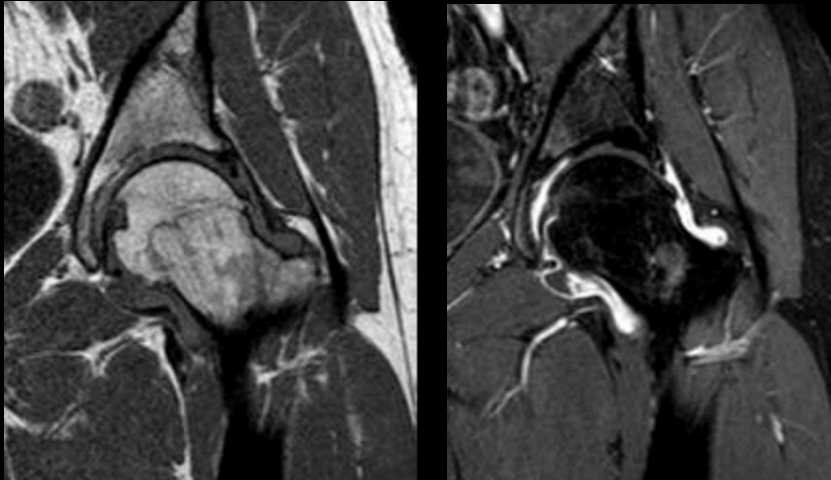

**SCORE 1 (T1, T1c)**

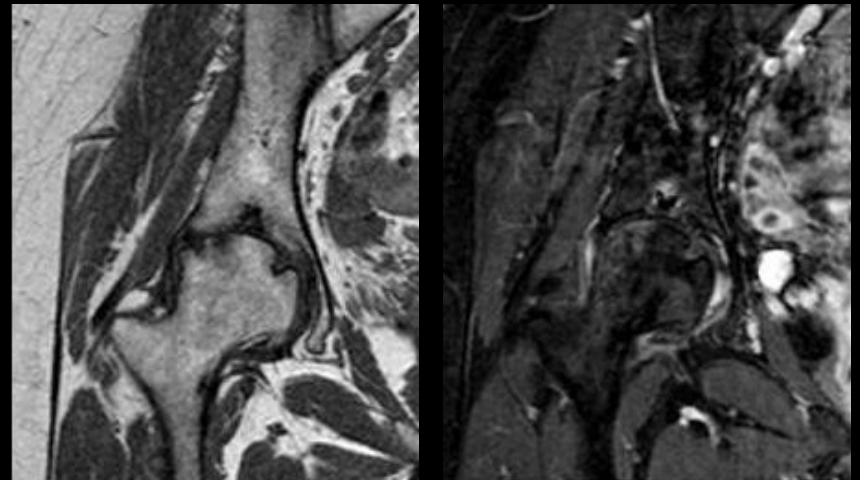

**SCORE 2 (T1, T1c)**

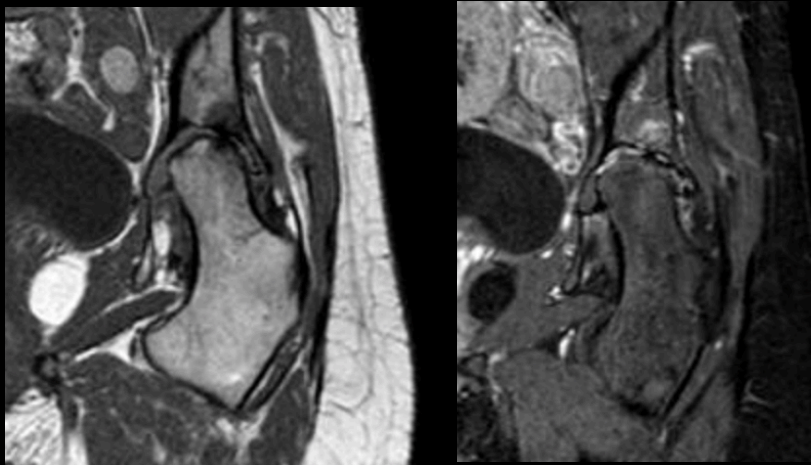

**SCORE 3 (T1, T1c)**

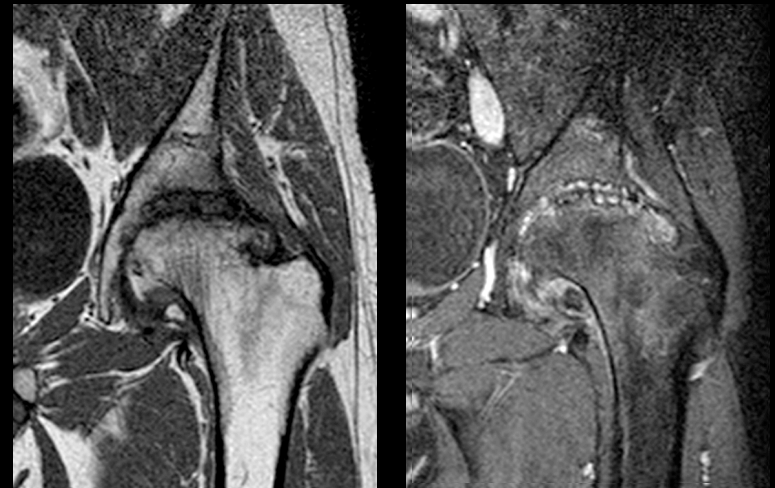

**EROSIONS OF  
ACETABULUM (SIMPLIFIED)**

- 0= NONE**
- 1= BONY IRREGULARITIES**
- 2= BONE EROSION**

**SCORE 0 – (T1, T1c)**

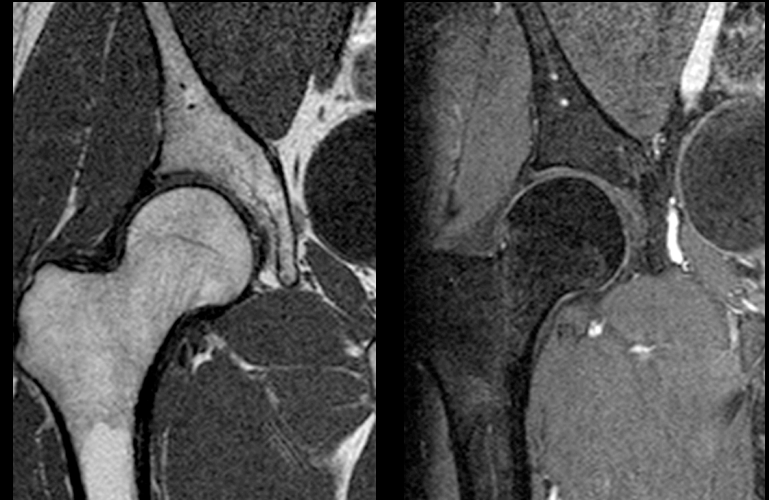

**SCORE 1 – (T1, T1c)**

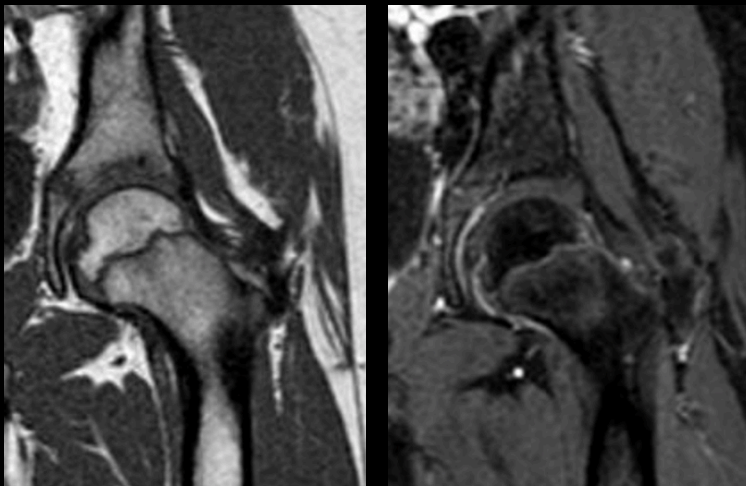

**SCORE 2 – (T1, T1c)**

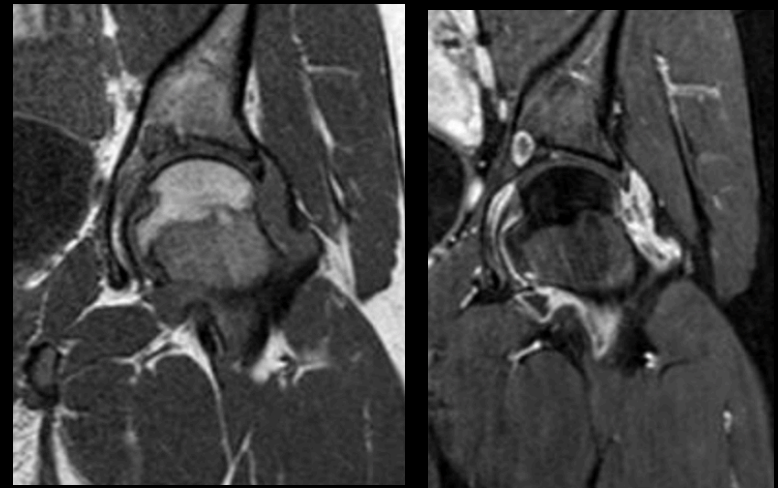

**EXAMPLE OF BONE CYST : 0 = NONE, 1 = PRESENT**

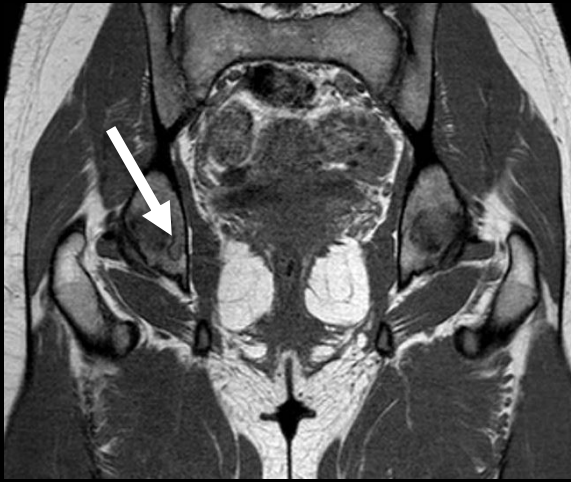

**T1**

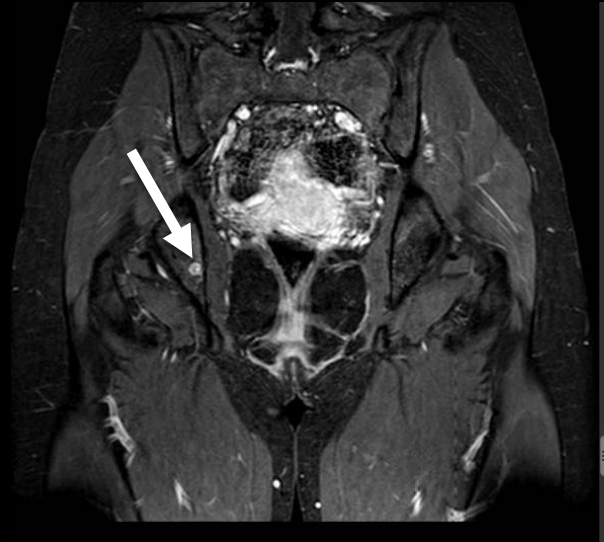

**T1 FS + CONTRAST**

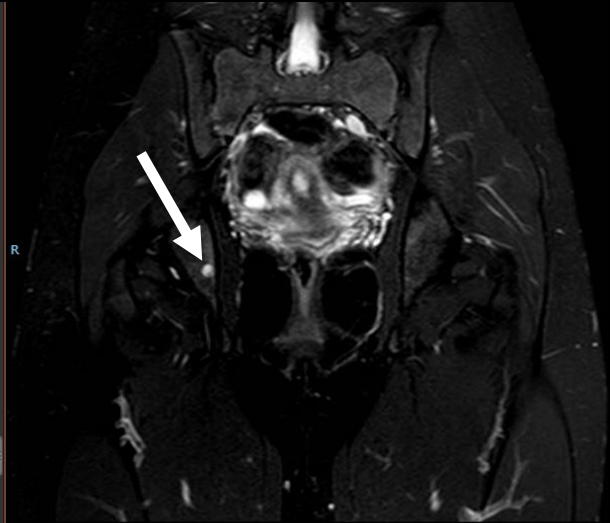

**T2FS**

**EXAMPLE OF ACTIVE  
EROSION**

**0 = NONE  
1 = PRESENT**

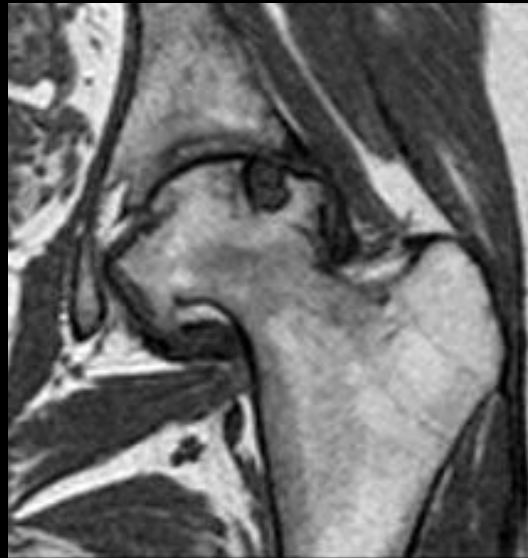

**T1**

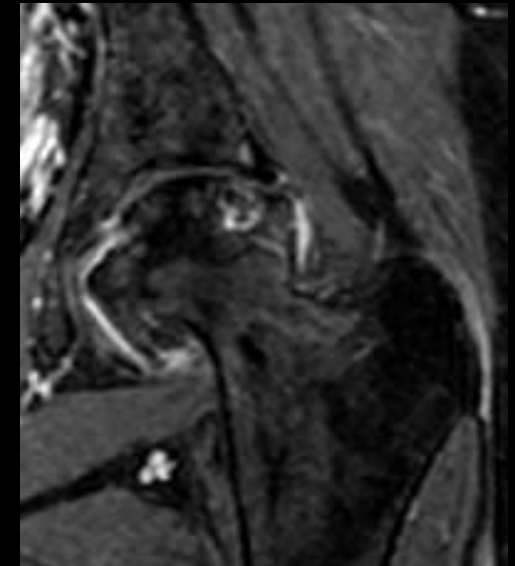

**T1 FS + CONTRAST**



## EXAMPLE OF OSTEOPHYTES

0 = NONE  
1 = PRESENT

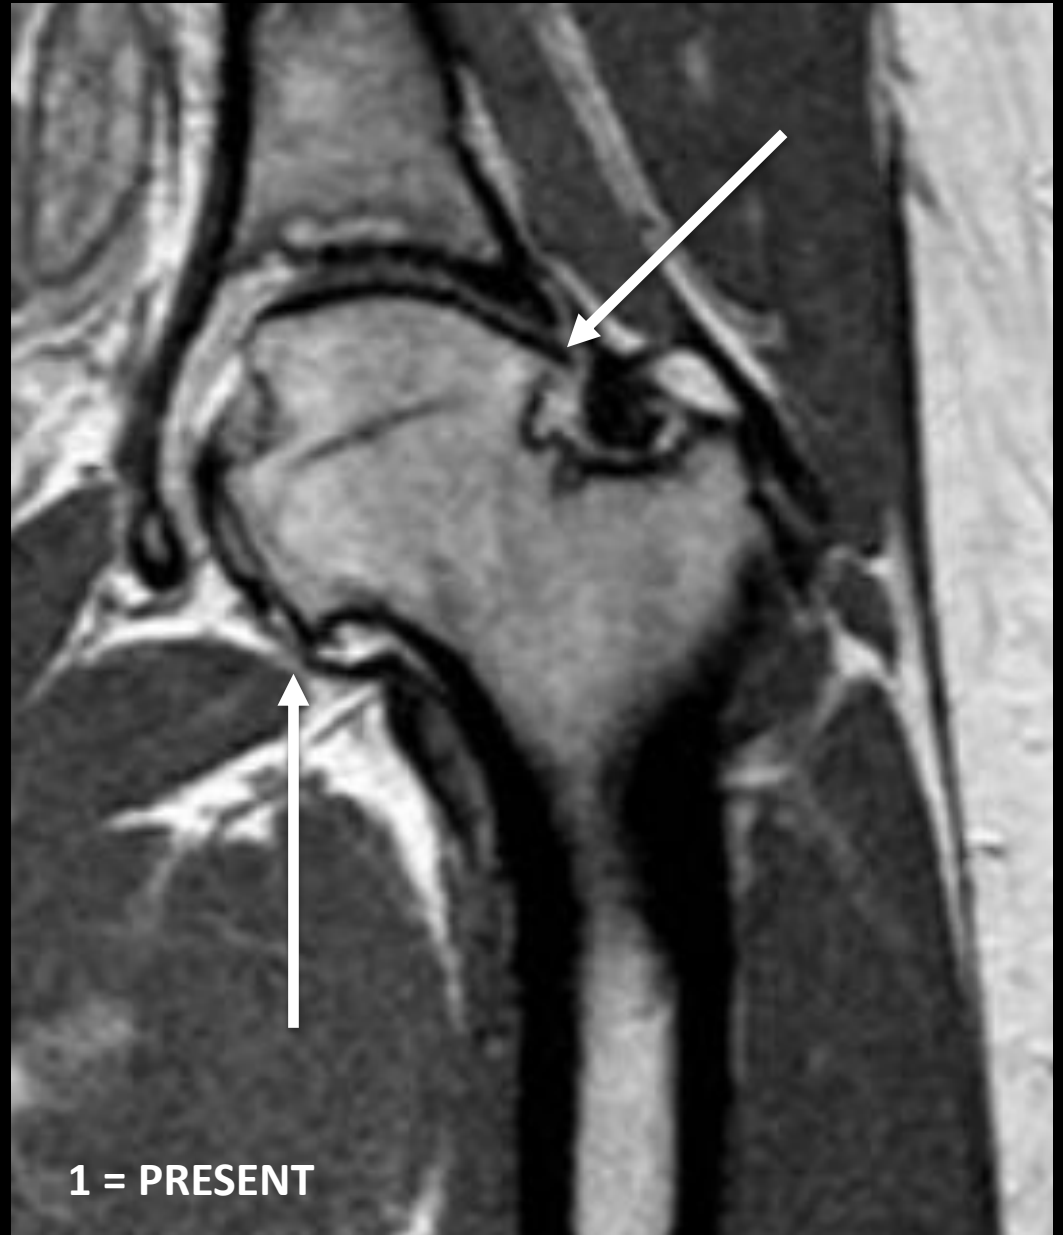

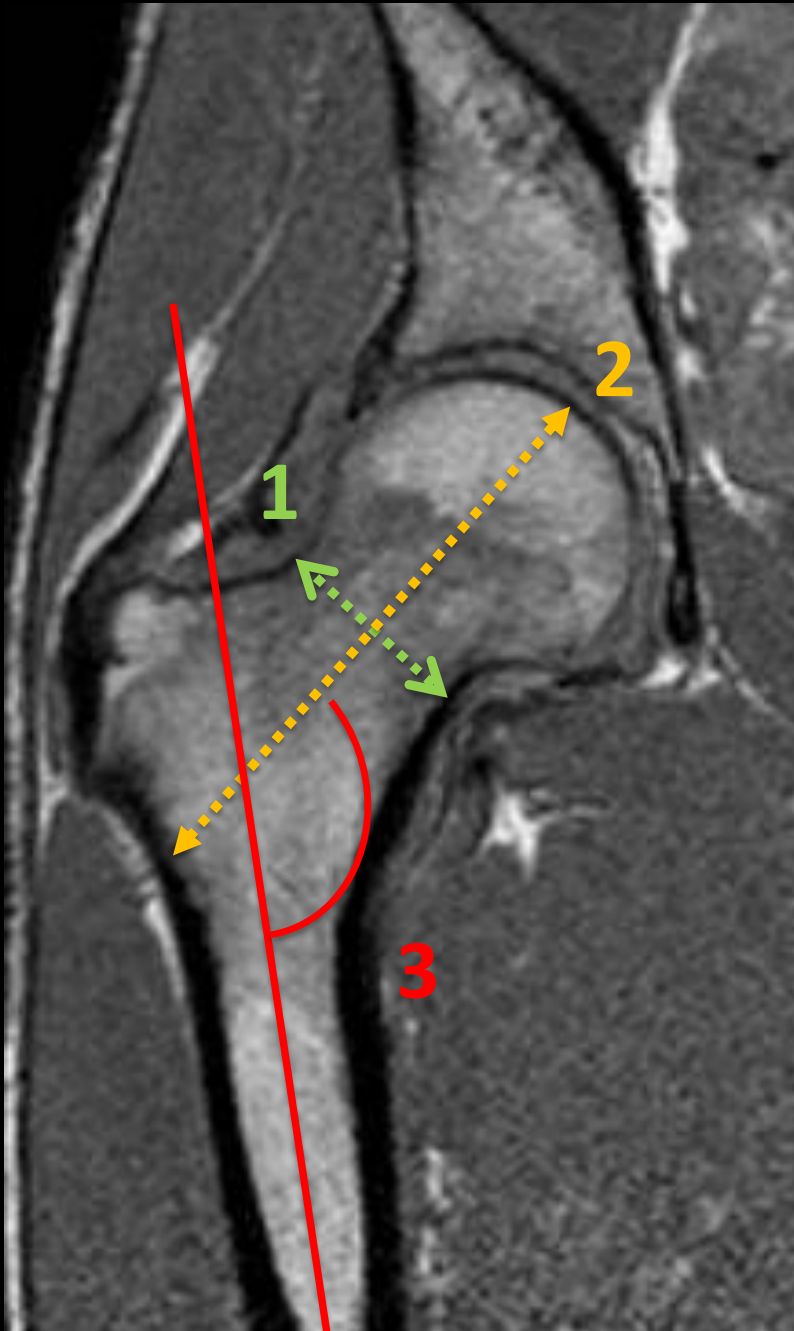

For all measurements, perform as per X-ray hip scoring paper, but pick a mid-section T1 image.

1. Draw a width of femoral neck (approx mid-neck)
2. At 90 degrees to this line, draw the femoral neck length
3. Draw a line through the femoral shaft. Where this line meets the femoral neck length line, measure the CCD angle.

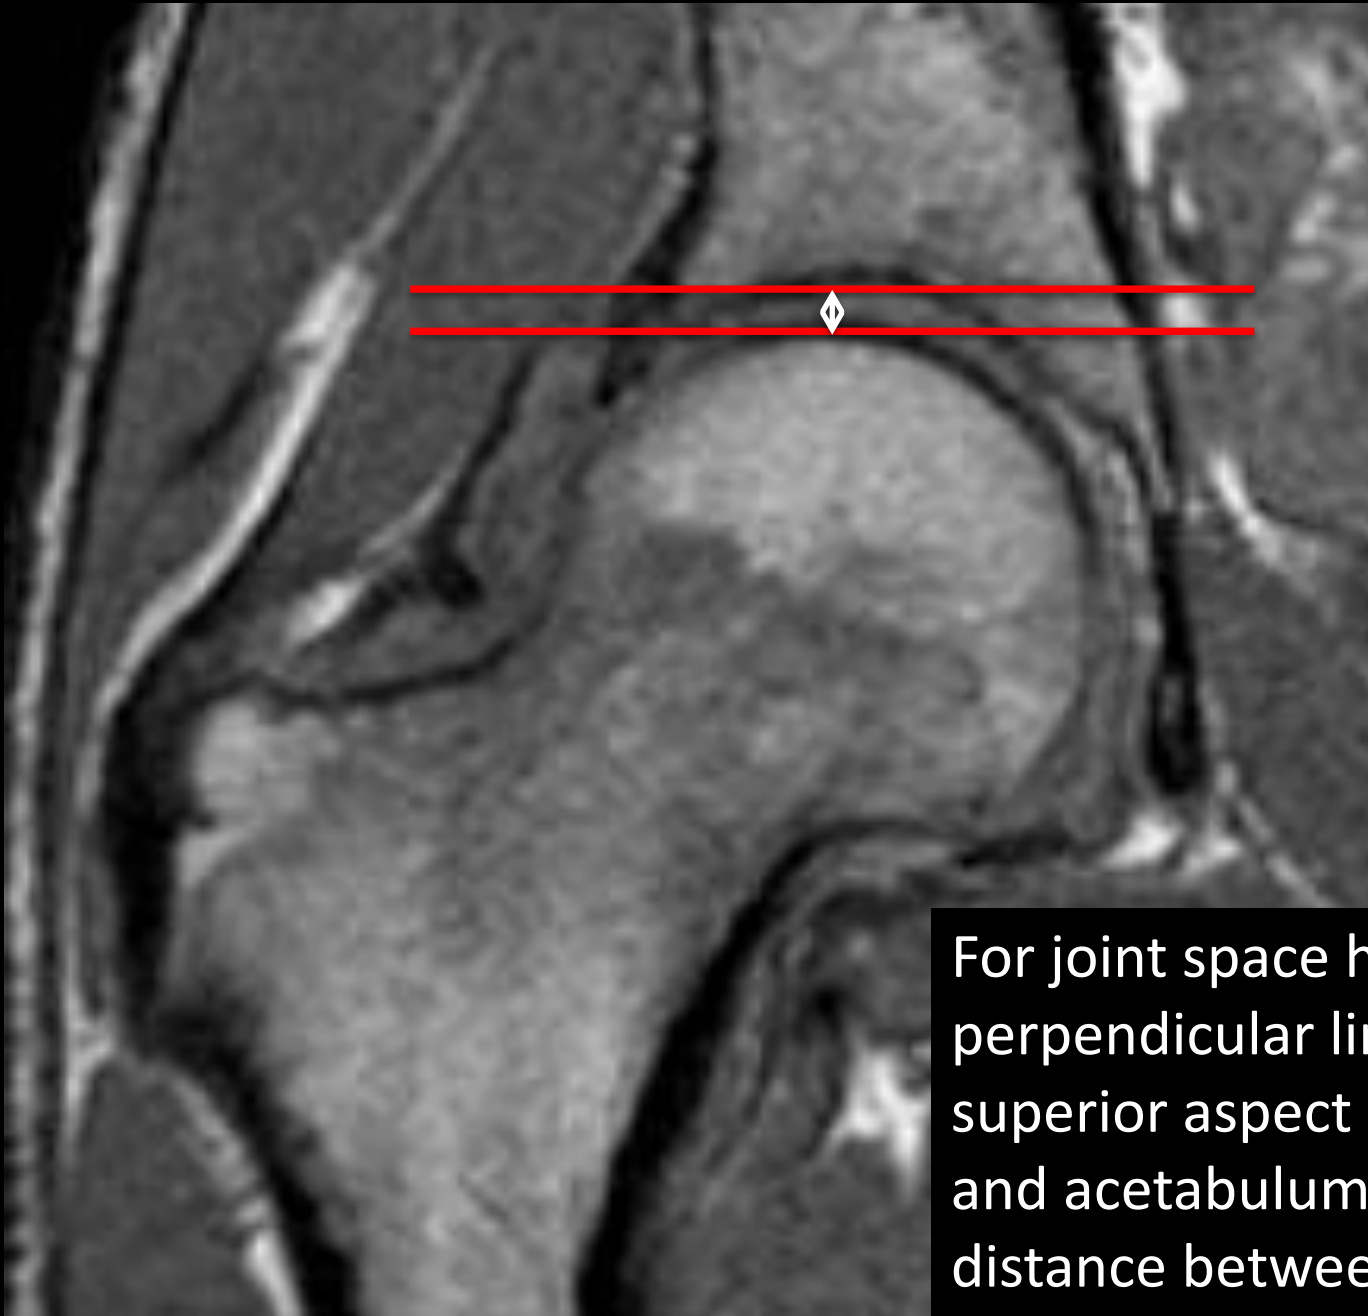

For joint space height, draw two perpendicular lines along superior aspect of femoral head and acetabulum. Measure distance between these lines.

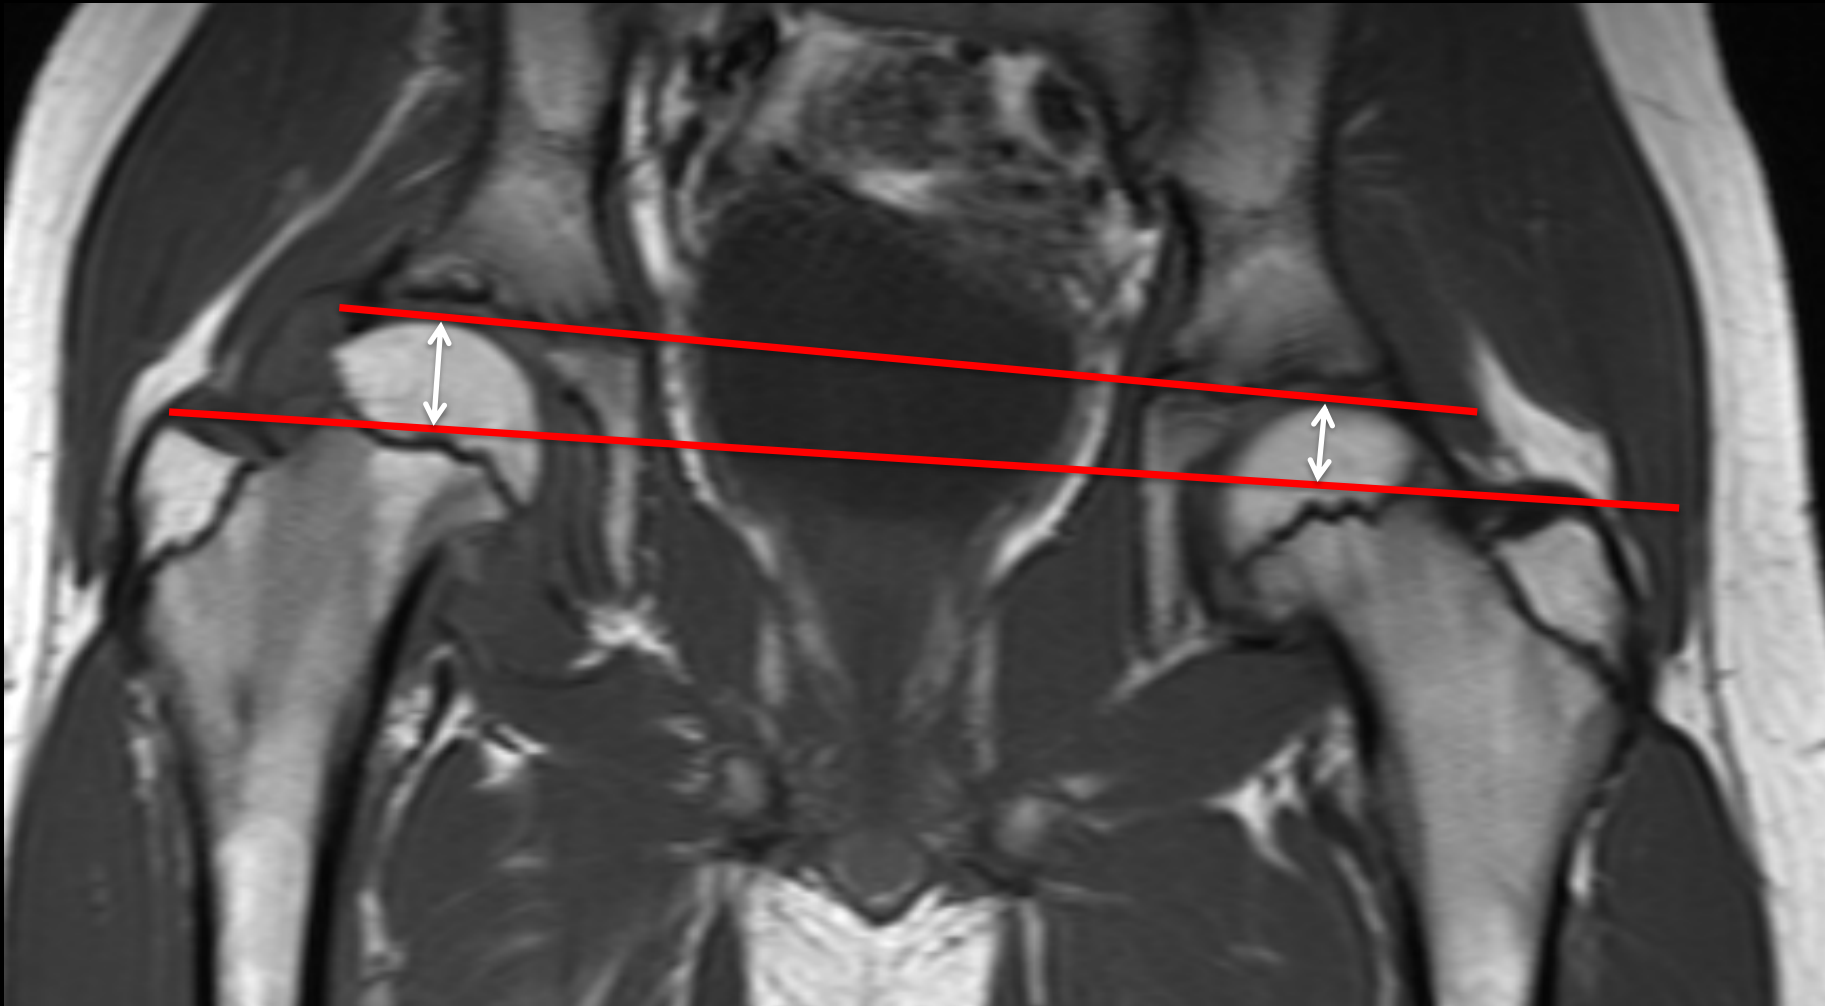

For trochanteric-femoral height, draw two lines, one along superior femoral head and one between the greater trochanters. Measure distance between the two lines at the femoral heads
